# Supplementary material for: Lung cancer in never-smoker Asian females is driven by oncogenic mutations, most often involving EGFR
Source: PubMed Central journal article supplement (PMC4467161; doi:10.18632/oncotarget.2925), 2015-02-28
Supplement: oncotarget-06-5465-s001.pdf [file oncotarget-06-5465-s001.pdf]

## SUPPLEMENTAL TABLES

**Supplemental Table 1: List of mutations in all patients**

| ID | Mutation                               |
|----|----------------------------------------|
| 1  | -                                      |
| 2  | -                                      |
| 3  | E746_A750del in EGFR, H1047R in PIK3CA |
| 4  | -                                      |
| 5  | L858R in EGFR                          |
| 6  | -                                      |
| 7  | -                                      |
| 8  | ALK fusion                             |
| 9  | -                                      |
| 10 | E746_A750del in EGFR                   |
| 11 | L858R in EGFR                          |
| 12 | L858R in EGFR                          |
| 13 | -                                      |
| 14 | -                                      |
| 15 | V769_D770insASV in EGFR                |
| 16 | L858R in EGFR                          |
| 17 | Q61R in NRAS                           |
| 18 | E746_A750del in EGFR                   |
| 19 | E746_A750del in EGFR                   |
| 20 | E746_A750del in EGFR                   |
| 21 | E746_A750del in EGFR                   |
| 22 | -                                      |
| 23 | L858R in EGFR                          |
| 24 | E746_A750del in EGFR, E542K in PIK3CA  |
| 25 | L858R in EGFR                          |
| 26 | H773_V774insPH in EGFR                 |
| 27 | L747_A750 > P in EGFR                  |
| 28 | L858R in EGFR                          |
| 29 | E746_A750del in EGFR                   |
| 30 | ALK fusion                             |
| 31 | L858R in EGFR                          |
| 32 | L858R in EGFR, R282W in TP53           |

(Continued)

| ID | Mutation                               |
|----|----------------------------------------|
| 33 | G12V in KRAS                           |
| 34 | L747-752del in EGFR                    |
| 35 | P753S,L747S,L747_P753 > S in EGFR      |
| 36 | P753S,L747S,L747_P753 > S in EGFR      |
| 37 | E746_A750del in EGFR                   |
| 38 | E746_A750del in EGFR                   |
| 39 | Q61H in KRAS                           |
| 40 | G12C in KRAS                           |
| 41 | L858R in EGFR                          |
| 42 | -                                      |
| 43 | L858R in EGFR                          |
| 44 | ALK fusion                             |
| 45 | E746_A750del in EGFR                   |
| 46 | L858R in EGFR                          |
| 47 | L858R in EGFR                          |
| 48 | RET fusion                             |
| 49 | E746_A750del in EGFR                   |
| 50 | M774_A775insAYVM in ERBB2              |
| 51 | -                                      |
| 52 | P753S,L747S,L747_P753 > S in EGFR      |
| 53 | L858R in EGFR                          |
| 54 | E709KH, L858R in EGFR                  |
| 55 | E545K in PIK3CA                        |
| 56 | ALK fusion                             |
| 57 | L858R in EGFR                          |
| 58 | L747_S752del, L747_A750 > P in EGFR    |
| 59 | L858R in EGFR                          |
| 60 | L858R in EGFR                          |
| 61 | ALK fusion                             |
| 62 | ALK fusion                             |
| 63 | L858R in EGFR                          |
| 64 | E746_A750del in EGFR, H1047L in PIK3CA |
| 65 | E746_A750del in EGFR                   |
| 66 | -                                      |
| 67 | -                                      |

(Continued)

| ID  | Mutation                                               |
|-----|--------------------------------------------------------|
| 68  | E746_A750del in EGFR                                   |
| 69  | -                                                      |
| 70  | L858R in EGFR                                          |
| 71  | ALK fusion                                             |
| 72  | V600E in b RAF                                         |
| 73  | -                                                      |
| 74  | V769_D770insASV in EGFR                                |
| 75  | ALK fusion                                             |
| 76  | E746_A750del in EGFR                                   |
| 77  | E746_A750del in EGFR                                   |
| 78  | L858R in EGFR                                          |
| 79  | L858R in EGFR, R248Q in TP53                           |
| 80  | -                                                      |
| 81  | L747_A750 > P in EGFR                                  |
| 82  | E746_A750del in EGFR                                   |
| 83  | -                                                      |
| 84  | -                                                      |
| 85  | -                                                      |
| 86  | L858R in EGFR                                          |
| 87  | L858R in EGFR                                          |
| 88  | L747_T751del in EGFR                                   |
| 89  | V600E in b RAF                                         |
| 90  | L858R, T790M in EGFR                                   |
| 91  | L747_A750 > P in EGFR                                  |
| 92  | L858R in EGFR                                          |
| 93  | RET fusion                                             |
| 94  | L858R in EGFR                                          |
| 95  | L858R in EGFR                                          |
| 96  | V769_D770insASV in EGFR                                |
| 97  | -                                                      |
| 98  | L858R in EGFR                                          |
| 99  | -                                                      |
| 100 | L858R in EGFR                                          |
| 101 | E746_E749del/I744_K745insKIPVAI/E746_A750 > IP in EGFR |
| 102 | L858R in EGFR, R175H in TP53                           |

(Continued)

| ID  | Mutation                                               |
|-----|--------------------------------------------------------|
| 103 | E746_A750del in EGFR                                   |
| 104 | L858R in EGFR                                          |
| 105 | E746_E749del/I744_K745insKIPVAI/E746_A750 > IP in EGFR |
| 106 | -                                                      |
| 107 | -                                                      |
| 108 | E709AGV,L858R in EGFR                                  |
| 109 | L747_A750 > P in EGFR                                  |
| 110 | -                                                      |
| 111 | ALK fusion                                             |
| 112 | L858R in EGFR                                          |
| 113 | -                                                      |
| 114 | L858R in EGFR                                          |
| 115 | L858R in EGFR                                          |
| 116 | L858R in EGFR                                          |
| 117 | -                                                      |
| 118 | E746_A750del in EGFR                                   |
| 119 | E746_A750del in EGFR                                   |
| 120 | -                                                      |
| 121 | L858R in EGFR, R175H in TP53                           |
| 122 | -                                                      |
| 123 | S752F,E746_S752 > V in EGFR                            |
| 124 | L858R in EGFR                                          |
| 125 | E746_A750del in EGFR                                   |
| 126 | E746_A750del in EGFR                                   |
| 127 | L858R in EGFR                                          |
| 128 | L858R in EGFR                                          |
| 129 | -                                                      |
| 130 | M774_A775insAYVM in ERBB2                              |
| 131 | T751P,L747_A750 > P,L747_T751 > P in EGFR              |
| 132 | G719S, S768I in EGFR                                   |
| 133 | L858R in EGFR                                          |
| 134 | G12D in KRAS                                           |
| 135 | -                                                      |
| 136 | ALK fusion                                             |
| 137 | L858R in EGFR                                          |

(Continued)

| ID  | Mutation                          |
|-----|-----------------------------------|
| 138 | -                                 |
| 139 | P753S,L747S,L747_P753 > S in EGFR |
| 140 | H773_V774insPH in EGFR            |
| 141 | -                                 |
| 142 | L858R in EGFR                     |
| 143 | L747_A750 > P in EGFR             |
| 144 | L858R in EGFR                     |
| 145 | -                                 |
| 146 | -                                 |
| 147 | L858R in EGFR                     |
| 148 | L858R in EGFR                     |
| 149 | E746_A750del in EGFR              |
| 150 | L858R in EGFR                     |
| 151 | ALK fusion                        |
| 152 | L858R in EGFR                     |
| 153 | E746_A750del, T790M in EGFR       |
| 154 | -                                 |
| 155 | L858R in EGFR                     |
| 156 | L858R in EGFR                     |
| 157 | -                                 |
| 158 | L858R in EGFR                     |
| 159 | L858R in EGFR                     |
| 160 | L858R in EGFR                     |
| 161 | L858R in EGFR                     |
| 162 | L858R in EGFR                     |
| 163 | L858R in EGFR                     |
| 164 | -                                 |
| 165 | L861Q in EGFR                     |
| 166 | ALK fusion                        |
| 167 | L858R in EGFR                     |
| 168 | -                                 |
| 169 | L858R in EGFR                     |
| 170 | L747_T751del in EGFR              |
| 171 | L858R in EGFR                     |
| 172 | H773_V774insH in EGFR             |

(Continued)

| ID  | Mutation                                                 |
|-----|----------------------------------------------------------|
| 173 | E746_A750del in EGFR                                     |
| 174 | V769_D770insASV in EGFR                                  |
| 175 | E746_A750del in EGFR                                     |
| 176 | L861Q in EGFR                                            |
| 177 | E746_A750del in EGFR                                     |
| 178 | -                                                        |
| 179 | G12D in KRAS                                             |
| 180 | ALK fusion                                               |
| 181 | ALK fusion                                               |
| 182 | E746_A750del in EGFR                                     |
| 183 | L858R in EGFR                                            |
| 184 | ROS fusion                                               |
| 185 | G12D in KRAS, A775_G776insYVMA in ERBB2, E542K in PIK3CA |
| 186 | T751P,L747_A750 > P,L747_T751 > P in EGFR                |
| 187 | E746_A750del in EGFR                                     |
| 188 | L858R in EGFR                                            |
| 189 | E746_A750del in EGFR                                     |
| 190 | E746_A750del in EGFR                                     |
| 191 | ROS fusion                                               |
| 192 | E746_A750del in EGFR                                     |
| 193 | G12C in KRAS                                             |
| 194 | G12D in KRAS                                             |
| 195 | E746_A750del, E746K/E746_T751 > IP in EGFR               |
| 196 | -                                                        |
| 197 | -                                                        |
| 198 | -                                                        |

**Supplemental Table 2: Validation of gene mutations by sanger sequencing**

| <b>ID</b> | <b>LungCarta</b>  | <b>Direct sequencing</b> |
|-----------|-------------------|--------------------------|
| 3         | EGFR E746_A750del | EGFR E746_A750del        |
| 10        | EGFR E746_A750del | EGFR E746_A750del        |
| 11        | EGFR L858R        | EGFR L858R               |
| 12        | EGFR L858R        | EGFR L858R               |
| 16        | EGFR L858R        | EGFR L858R               |
| 19        | EGFR E746_A750del | EGFR E746_A750del        |
| 20        | EGFR E746_A750del | EGFR E746_A750del        |
| 23        | EGFR L858R        | EGFR L858R               |
| 134       | KRAS G12D         | KRAS G12D                |
| 179       | KRAS G12D         | KRAS G12D                |
| 185       | KRAS G12D         | KRAS G12D                |

**Supplemental Table 3: Relationship between driver mutation status and histologic pattern**

**Supplemental Table 4: Association of driver gene mutation and patient age**

| Driver gene   | Status  | Age mean $\pm$ sd | <i>p</i> value |
|---------------|---------|-------------------|----------------|
| <i>EGFR</i>   | mutated | 61.3 $\pm$ 9.3    | 0.042          |
|               | wild    | 58.3 $\pm$ 11.0   |                |
| <i>ALK</i>    | mutated | 51.3 $\pm$ 11.6   | 0.004          |
|               | wild    | 60.8 $\pm$ 9.6    |                |
| <i>KRAS</i>   | mutated | 61.0 $\pm$ 8.0    | 0.872          |
|               | wild    | 60.1 $\pm$ 10.1   |                |
| <i>PIK3CA</i> | mutated | 59.6 $\pm$ 7.6    | 0.809          |
|               | wild    | 60.2 $\pm$ 10.1   |                |
| <i>TP53</i>   | mutated | 57.8 $\pm$ 11.1   | 0.64           |
|               | wild    | 60.2 $\pm$ 10.0   |                |
| <i>ERBB2</i>  | mutated | 47.0 $\pm$ 10.8   | 0.044          |
|               | wild    | 60.4 $\pm$ 9.9    |                |
| <i>BRAF</i>   | mutated | 75.5 $\pm$ 3.5    | 0.031          |
|               | wild    | 60.0 $\pm$ 10.0   |                |
| <i>ROS1</i>   | mutated | 61.0 $\pm$ 9.9    | 0.946          |
|               | wild    | 60.2 $\pm$ 10.1   |                |
| <i>RET</i>    | mutated | 57.0 $\pm$ 9.9    | 0.581          |
|               | wild    | 60.2 $\pm$ 10.1   |                |

**Supplemental Table 5: Summary of previous studies investigating driver gene mutation in lung adenocarcinoma of East Asian non-smokers**

| Author                  | Year | Country | Number of patients | Female ratio | <i>EGFR</i> | <i>ALK</i> | <i>KRAS</i> | <i>ERBB2</i> | <i>BRAF</i> | <i>ROS1</i> | <i>RET</i> | Unknown |
|-------------------------|------|---------|--------------------|--------------|-------------|------------|-------------|--------------|-------------|-------------|------------|---------|
| Sun et al. <sup>1</sup> | 2010 | China   | 52                 | 78.80%       | 78.8%       | 5.8%       | 1.9%        | 3.8%         | NA          | NA          | NA         | 9.6%    |
| Ren et al.              | 2012 | China   | 104                | 100%         | 70.2%       | 9.6%       | NA          | NA           | NA          | NA          | NA         | 20.2%   |
| Zhang et al.            | 2012 | China   | 349                | 100%         | 76.2%       | 4.3%       | 2.0%        | 4.6%         | 0.6%        | NA          | NA         | 12.3%   |
| Kim et al.              | 2014 | Korea   | 162                | 84.60%       | 50.6%       | 8.6%       | 3.7%        | NA           | NA          | 3.1%        | NA         | 33.9%   |
| Li et al.               | 2014 | China   | 202                | 78.70%       | 75.3%       | 5.0%       | 2.0%        | 6.0%         | 0.0%        | 1.0%        | NA         | 12.9%   |
| Present study           | 2014 | Korea   | 198                | 100%         | 62.6%       | 7.1%       | 4.0%        | 1.5%         | 1.0%        | 1.0%        | 1.0%       | 20.7%   |

NA, Not applicable
